# Supplementary material for: Temporal fusion transformer-based strategy for efficient multi-cloud content replication
Source: PeerJ journal article supplement (doi:10.7717/peerj-cs.2713), 2025-03-25
Supplement: Table_S2.docx [file Table_S2.docx]

Table 2:Configuration settings

| **Data Centre** | **Number of Systems** | **PE per System** | **Processing Speed (MIPS)** | **Bandwidth** |
| --- | --- | --- | --- | --- |
| Super Data Node | 50 | 10 to 20 | 800 to 1000 | 10 Gbps |
| Main Data Node | 20 | 5 to 10 | 400 to 800 | 2 Gbps |
| Normal Data Node | 10 | 1 to 4 | 100 to 400 | 1 Gbps |
