# Supplementary material for: Temporal fusion transformer-based strategy for efficient multi-cloud content replication
Source: PeerJ journal article supplement (doi:10.7717/peerj-cs.2713), 2025-03-25
Supplement: Table_S4.docx [file Table_S4.docx]

**Table 4.** Effects of the various fault scenarios on the model robustness and basic performance parameters.

| **Condition** | **Impact on Model Stability** | **Performance Metrics** | |
| --- | --- | --- | --- |
| **Accuracy (%)** | **F1-Score (%)** |
| **Normal Operation** | Stable | 95% | 92% |
| **High File Access Load** | Minor performance degradation | 90% | 87% |
| **Server Failures** | Temporary instability | 75% | 70% |
